# Supplementary material for: Ambulatory Video EEG extended to 10 days: A retrospective review of a large database of ictal events
Source: bioRxiv or medRxiv preprint supplement (doi:10.1101/2023.04.12.23288496), 2023-04-17
Supplement: Supplementary file [file media-1.pdf]

## Supplementary Material

| <b>Duration<br/>(days)</b> | <b>Diagnostic<br/>(n)</b> | <b>Characterization<br/>(n)</b> | <b>Treatment<br/>(n)</b> |
|----------------------------|---------------------------|---------------------------------|--------------------------|
| 1                          | 6                         | 4                               | 6                        |
| 2                          | 5                         | 7                               | 2                        |
| 3                          | 85                        | 52                              | 48                       |
| 4                          | 29                        | 17                              | 23                       |
| 5                          | 15                        | 7                               | 11                       |
| 6                          | 16                        | 15                              | 4                        |
| 7                          | 182                       | 100                             | 70                       |
| Total                      | 338                       | 202                             | 164                      |

**Table S1** Number of AVEM studies (n) relative to their full study duration (days). Note this only includes studies of duration 1-7 days. Note 32 diagnostic, 22 characterization, and 10 treatment studies were not included as the duration was greater than 7 days.

| <b>Day</b> | <b>Frequency (n)</b> | <b>Cumulative %</b> |
|------------|----------------------|---------------------|
| 1          | 188                  | 50.81%              |
| 2          | 67                   | 68.92%              |
| 3          | 40                   | 79.73%              |
| 4          | 32                   | 88.38%              |
| 5          | 22                   | 94.32%              |
| 6          | 12                   | 97.57%              |
| 7          | 7                    | 99.46%              |
| 8          | 1                    | 99.73%              |
| 9          | 1                    | 100.00%             |

**Table S2a** Distribution of time (day) since the start of AVEM, until epileptic diagnosis was made in the diagnostic cohort (n=370), with cumulative percentage answered with each additional day. Note that 99% of diagnostic studies were answered by the end of day 7.

|                    |         |
|--------------------|---------|
| <b>Median (hr)</b> | 23.248  |
| <b>Q1 (hr)</b>     | 9.293   |
| <b>Q3 (hr)</b>     | 59.536  |
| <b>IQR (hr)</b>    | 50.243  |
| <b>Mean (hr)</b>   | 39.810  |
| <b>SD (hr)</b>     | 40.381  |
| <b>Min (hr)</b>    | 0.0119  |
| <b>Max (hr)</b>    | 207.148 |

**Table S2b** Descriptive statistics for the AVEM duration in the diagnostic cohort (n=370). The median AVEM time needed to answer diagnostic studies was 23.248 hours. 50% of patients required durations between 9.293 (Q1) and 59.536 hours (Q3). The minimum time was 0.0119 hours and the maximum time was 207.148 hours.

| Day | Frequency (n) | Cumulative % |
|-----|---------------|--------------|
| 1   | 117           | 52.23%       |
| 2   | 38            | 69.20%       |
| 3   | 25            | 80.36%       |
| 4   | 17            | 87.95%       |
| 5   | 10            | 92.41%       |
| 6   | 8             | 95.98%       |
| 7   | 8             | 99.55%       |
| 8   | 0             | 99.55%       |
| 9   | 1             | 100.00%      |

**Table S3a** Distribution of time (day) since the start of AVEM, until epileptic characterization was made in the characterization cohort (n=224), with cumulative percentage answered with each additional day. Note that 99% of characterizing studies were answered by the end of day 7.

|                    |         |
|--------------------|---------|
| <b>Median (hr)</b> | 20.535  |
| <b>Q1 (hr)</b>     | 9.237   |
| <b>Q3 (hr)</b>     | 57.965  |
| <b>IQR (hr)</b>    | 48.728  |
| <b>Mean (hr)</b>   | 39.890  |
| <b>SD (hr)</b>     | 42.180  |
| <b>Min (hr)</b>    | 0.281   |
| <b>Max (hr)</b>    | 208.880 |

**Table S3b** Descriptive statistics for the AVEM duration in the characterization cohort (n=224). The median AVEM time needed to answer characterization studies was 20.53 hours. 50% of patients required durations between 9.24 (Q1) and 57.97 hours (Q3). The minimum time was 0.281 hours and the maximum time was 208.880 hours.

| Day | Frequency (n) | Cumulative % |
|-----|---------------|--------------|
| 1   | 102           | 58.62%       |
| 2   | 27            | 74.14%       |
| 3   | 20            | 85.63%       |
| 4   | 18            | 95.98%       |
| 5   | 3             | 97.70%       |
| 6   | 3             | 99.43%       |
| 7   | 1             | 100.00%      |

**Table S4a** Distribution of time (day) since the start of AVEM in the treatment cohort (n=174), until sufficient post-treatment assessment is made, with cumulative percentages listed for each additional day. Note that 99% of characterizing studies were answered by the end of day 6.

|                    |          |
|--------------------|----------|
| <b>Median (hr)</b> | 18.4369  |
| <b>Q1 (hr)</b>     | 5.1077   |
| <b>Q3 (hr)</b>     | 49.1109  |
| <b>IQR</b>         | 44.0031  |
| <b>Mean (hr)</b>   | 30.9668  |
| <b>SD (hr)</b>     | 32.7832  |
| <b>Min (hr)</b>    | 0.2812   |
| <b>Max (hr)</b>    | 164.5578 |

**Table S4b** Descriptive statistics for the AVEM duration in the treatment cohort (n=174). The median AVEM time needed to answer characterization studies was 18.437 hours. 50% of patients required durations between 5.108 (Q1) and 49.111 hours (Q3). The minimum time was 0.281 hours and the maximum time was 164.558 hours.

| <b>Group 1</b>          | <b>Group 2</b>          | <b>Median difference (hr)</b> | <b>U-statistic</b> | <b>Significance (p)</b> |
|-------------------------|-------------------------|-------------------------------|--------------------|-------------------------|
| <b>Diagnostic</b>       | <b>Characterization</b> | 2.713                         | -9.215             | 3.10E-20                |
| <b>Diagnostic</b>       | <b>Treatment</b>        | 4.811                         | -11.041            | 2.41E-28                |
| <b>Characterization</b> | <b>Treatment</b>        | 2.098                         | 1.695              | 9.00E-02                |

**Table S5a** Significant differences were found between diagnostic and characterization groups ( $\mu_d = 2.713$ ,  $U = -9.215$ ,  $n_1 = 370$ ,  $n_2 = 224$ , Wilcoxin Rank-Sum test,  $p < 0.01$ ), and between diagnostic and treatment groups ( $\mu_d = 4.811$ ,  $U = -11.041$ ,  $n_1 = 370$ ,  $n_2 = 174$ ,  $p < 0.01$ ). Characterization and treatment groups did not differ significantly ( $\mu_d = 2.098$ ,  $U = 1.695$ ,  $n_1 = 224$ ,  $n_2 = 174$ ,  $p = 0.09$ ).  $\mu_d$  = difference in median,  $n_1$  = sample size 1,  $n_2$  = sample size 2

| <b>Group 1</b> | <b>Group 2</b>     | <b>Median difference (hr)</b> | <b>U-statistic</b> | <b>Significance (p)</b> |
|----------------|--------------------|-------------------------------|--------------------|-------------------------|
| <b>Focal</b>   | <b>Generalized</b> | 23.266                        | 3.527              | 4.21E-04                |

**Table 5b** Significant differences in AVEM duration were found in the characterization cohort ( $n = 224$ ), between focal (median = 34.22 hrs,  $n = 147$ ) and generalized groups (median = 10.96 hrs,  $n = 77$ ) (Wilcoxin Rank-Sum test).
